# Supplementary material for: Gene therapy targeting miR-212-3p exerts therapeutic effects on MAFLD similar to those of exercise
Source: PubMed Central journal article supplement — Int J Mol Med. 2023 Jan 11;51(2):16. doi: 10.3892/ijmm.2023.5219 (PMC9869725; doi:10.3892/ijmm.2023.5219), 2023-01-11

Figure S1. miR-212-3p does not regulate FGF21 and CHD1 at the mRNA level. (A and B) mRNA levels of FGF21 and CHD1. FGF21, fibroblast growth factor 21; CHD1, chromodomain helicase DNA binding protein 1.

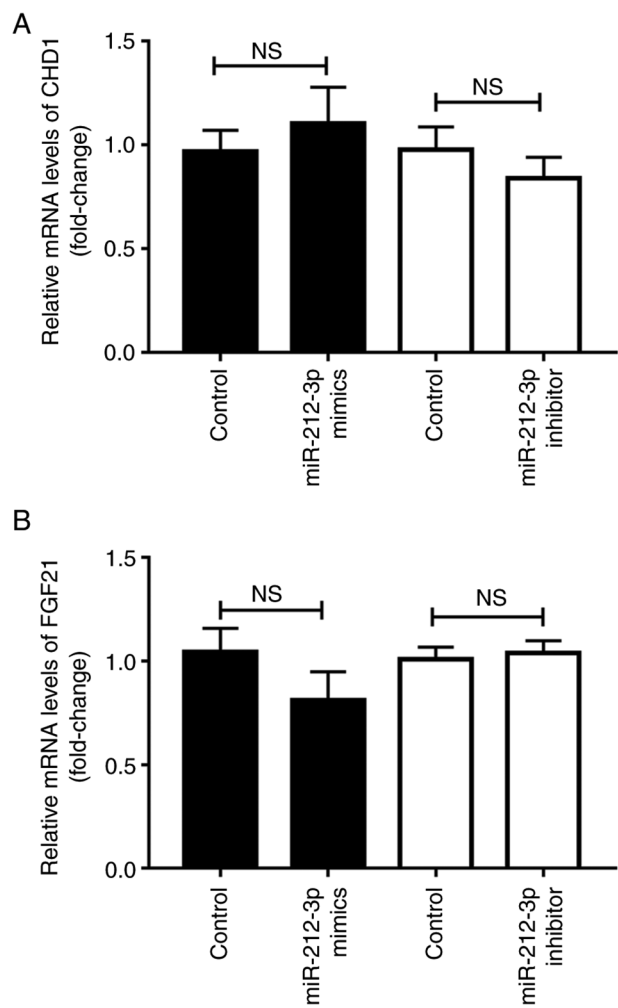

Figure S2. Relative luciferase activity of luciferase reporters. (A) Predictive binding sites of miR-212-3p to FGF21 and schematic of wild-type and mutant pmiRGLO-FGF21 constructs. (B and C) Relative luciferase activity of luciferase reporters containing wild-type or mutant FGF21 co-transfected with miR-212-3p mimics or inhibitors or negative control in 293T cells. Data are from three independent experiments performed in triplicate. \*P<0.05. FGF21, fibroblast growth factor 21.

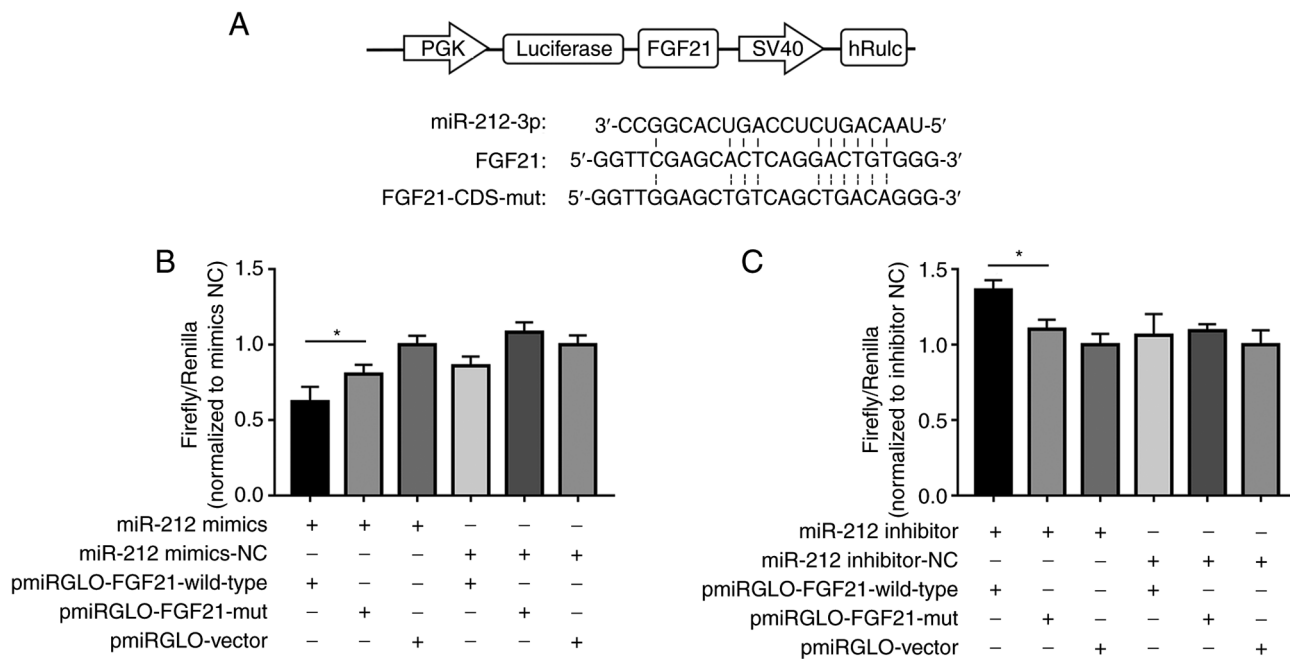

Figure S3. Relative luciferase activity of luciferase reporters. (A) Schematic diagram of pGL3 luciferase reporter constructs containing the 2.0-kb promoter region to the miR-212-3p cluster gene. (B and C) The interaction between EGR1 and miR-212-3p was verified by a luciferase reporter assay. Data are from three independent experiments. The data are presented as the mean  $\pm$  SEM. \*\*P<0.01. EGR1, early growth response 1.

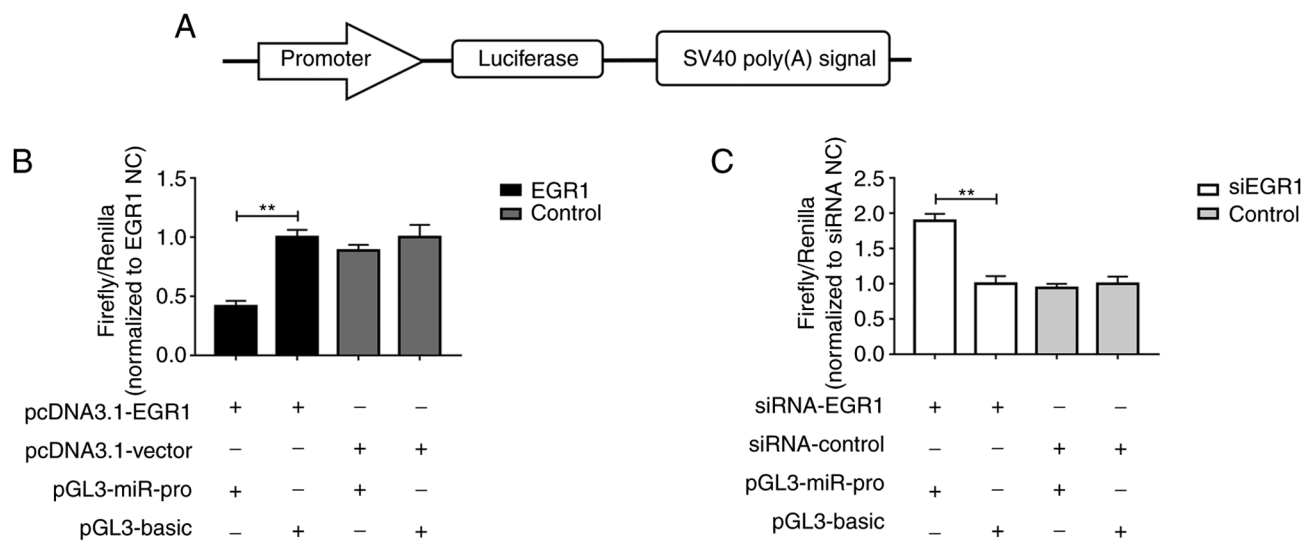

Supplement: Supplementary_Data1.pdf [file Supplementary_Data1.pdf]
