# Supplementary material for: Gene therapy targeting miR-212-3p exerts therapeutic effects on MAFLD similar to those of exercise
Source: PubMed Central journal article supplement — Int J Mol Med. 2023 Jan 11;51(2):16. doi: 10.3892/ijmm.2023.5219 (PMC9869725; doi:10.3892/ijmm.2023.5219), 2023-01-11
Supplement: Supplementary_Data2.pdf [file Supplementary_Data2.pdf]

| Table SI. Sequences of RT-qPCR primers and siRNAs used in the present study.                                                                                                                                           |                              |                         |
|------------------------------------------------------------------------------------------------------------------------------------------------------------------------------------------------------------------------|------------------------------|-------------------------|
| Sequences of siRNAs                                                                                                                                                                                                    |                              |                         |
| Gene name                                                                                                                                                                                                              | Sense (5'-3')                | Antisense (5'-3')       |
| EGR1 <sup>siRNA</sup>                                                                                                                                                                                                  | GAUGAACGCAAGAGGCAUAAU        | PUAUGCCUCUUGCGUUCAUCUU  |
| EGR1 <sup>control</sup>                                                                                                                                                                                                | GAUAUGACGACAGAGAUAAU         | PUAUCUCUGUCGUCAUAUCUU   |
| CHD1 <sup>siRNA</sup>                                                                                                                                                                                                  | GGAGAGAUUCAGUAUUUAAAU        | UUAAAUACUGAAUCUCUCCUG   |
| CHD1 <sup>control</sup>                                                                                                                                                                                                | GGAAGAUUCCCAGUAAUUAAAU       | UUAAUUACUGGGAAUCUCCUG   |
| FGF21 <sup>siRNA</sup>                                                                                                                                                                                                 | GGUUAUUUAUCUUAUUUAAUU        | AUAAAUAAAGAUAAAUAAACCUA |
| FGF21 <sup>control</sup>                                                                                                                                                                                               | UGAUAUUAACUCUAUGUAUUU        | AUACAUAGAGUAAUAUCAUA    |
| For mice                                                                                                                                                                                                               |                              |                         |
| Gene name                                                                                                                                                                                                              | Forward primer (5'-3')       | Reverse primer (5'-3')  |
| FASN                                                                                                                                                                                                                   | GGAGGTGGTGATAGCCGGTAT        | TGGGTAATCCATAGAGCCCAG   |
| CPT1 $\alpha$                                                                                                                                                                                                          | CTCCGCCTGAGCCATGAAG          | CACCAGTGATGATGCCATTCT   |
| miR212-3p                                                                                                                                                                                                              | ACACTCCAGCTGGGTAACAGTCTCCAGT | TGGTGTCGTGGAGTCG        |
| $\beta$ -actin                                                                                                                                                                                                         | GGCTGTATTCCCCTCCATCG         | CCAGTTGGTAACAATGCCATGT  |
| For humans                                                                                                                                                                                                             |                              |                         |
| Gene name                                                                                                                                                                                                              | Forward primer (5'-3')       | Reverse primer (5'-3')  |
| EGR1                                                                                                                                                                                                                   | GGTCAGTGGCCTAGTGAGC          | GTGCCGCTGAGTAAATGGGA    |
| FGF21                                                                                                                                                                                                                  | CTGTGGGTTTCTGTGCTGG          | CCGGCTTCAAGGCTTTCAG     |
| CHD1                                                                                                                                                                                                                   | GTAGCCAGTCAGGTAGCAGTG        | ACTTTCGGTGGTTTTGCTTGAA  |
| miR212-3p                                                                                                                                                                                                              | ACACTCCAGCTGGGTAACAGTCTCCAG  | TGGTGTCGTGGAGTCG        |
| $\beta$ -actin                                                                                                                                                                                                         | CATGTACGTTGCTATCCAGGC        | CTCCTTAATGTCACGCACGAT   |
| U6                                                                                                                                                                                                                     | CTCGCTTCGGCAGCACA            | AACGCTTACGAATTTGCGT     |
| EGR1, early growth response 1; FGF21, fibroblast growth factor 21; CHD1, chromodomain helicase DNA binding protein 1; FASN, fatty acid synthase; PPAR $\alpha$ , peroxisome proliferator activated receptor $\alpha$ . |                              |                         |

Table SII. Expression of miR-212-3p and miR-212-5p in the microarray.

| Systematic name           | P-value | Fold change | Regulation |
|---------------------------|---------|-------------|------------|
| miR-212-3p (Chow vs. HFD) | 0.001   | 4.361       | Up         |
| miR-212-3p (HFD vs. HE)   | 0.004   | 3.421       | Down       |
| miR-212-5p (Chow vs. HFD) | 0.310   | 1.158       | Up         |
| miR-212-5p (HFD vs. HE)   | 0.045   | 1.305       | Down       |

HFD, high-fat diet; HE, high-fat diet and exercise.

**Table SIII. Potential upstream regulators of miR-212 predicted by Jasper and RegRNA 2.0.**

| Transcription factor | Score in mice | Score in humans |
|----------------------|---------------|-----------------|
| EGR1                 | 19.6386       | 18.1039         |
| SP1                  | 17.3958       | 17.3958         |
| CREB1                | 14.9162       | 14.716          |
| Ahr::Arnt            | 9.19659       | 9.19659         |
| E2F1                 | 13.6374       |                 |
| NFE2L2               | 13.5578       |                 |
| Ets1                 | 13.215        |                 |
| Gabpa                | 13.1723       |                 |
| ELK1                 | 11.6506       |                 |
| Pax5                 | 9.77507       |                 |
| MZF1                 | 9.08528       |                 |
| AFT2                 | 7.02718       |                 |
| SOX9                 |               | 9.066076        |
| Myc                  |               | 14.6206         |
| MAX                  |               | 13.1326         |
| Mafb                 |               | 8.91059         |
| Gata1                |               | 7.01644         |
| SRY                  |               | 8.86562         |
